# Supplementary material
Source: Springer Nature journal article supplement (https://www.springermedizin.de/resource/supplementary/12889_2012_5063_MOESM3_ESM.pdf/9494376)

# Psychological well-being

## Study name

## Statistics for each study

## Std diff in means and 95% CI

|                       | Std diff<br>in means | Upper<br>limit | Lower<br>limit | Z-Value | p-Value |
|-----------------------|----------------------|----------------|----------------|---------|---------|
| Abbott 2009           | -0,06                | 0,48           | -0,60          | -0,22   | 0,83    |
| Cheavens 2006         | 0,18                 | 0,89           | -0,53          | 0,50    | 0,62    |
| Emmons 2006 study 3   | 0,66                 | 1,16           | 0,16           | 2,58    | 0,01    |
| Fava 1998             | 0,32                 | 1,20           | -0,56          | 0,71    | 0,48    |
| Fava 2005             | 2,43                 | 3,75           | 1,11           | 3,60    | 0,00    |
| Feldman 2012          | 0,00                 | 0,49           | -0,49          | 0,00    | 1,00    |
| Frieswijk 2005        | 0,13                 | 0,43           | -0,18          | 0,82    | 0,41    |
| Gander 2012           | 0,10                 | 0,35           | -0,15          | 0,77    | 0,44    |
| Goldstein 2007        | -0,02                | 0,44           | -0,48          | -0,08   | 0,94    |
| Green 2006            | 0,50                 | 1,06           | -0,07          | 1,72    | 0,08    |
| Layout 2012           | 0,17                 | 0,56           | -0,22          | 0,86    | 0,39    |
| Luthans 2008          | 0,23                 | 0,44           | 0,02           | 2,19    | 0,03    |
| Luthans 2010          | 0,36                 | 0,62           | 0,10           | 2,68    | 0,01    |
| Mitchell 2009         | 0,29                 | 0,68           | -0,10          | 1,44    | 0,15    |
| Mongrain 2010-2012    | 0,11                 | 0,29           | -0,07          | 1,21    | 0,23    |
| Page 2012             | 0,58                 | 1,42           | -0,26          | 1,35    | 0,18    |
| Seligman 2005         | 0,01                 | 0,27           | -0,24          | 0,11    | 0,91    |
| Seligman 2006 study 2 | 0,87                 | 1,79           | -0,05          | 1,84    | 0,07    |
| Sheldon 2002          | 0,00                 | 0,45           | -0,45          | 0,00    | 1,00    |
| Spence 2007           | 0,17                 | 0,82           | -0,48          | 0,51    | 0,61    |
|                       | 0,20                 | 0,30           | 0,09           | 3,70    | 0,00    |

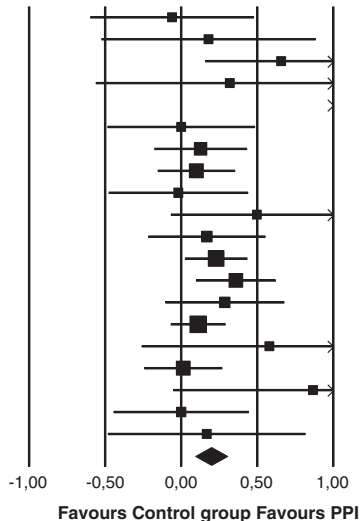

Supplement: MOESM3 [file 9494376]
